# Supplementary material for: A push-pull aromaticchromophore with a touch of merocyanine
Source: Royal Society of Chemistry journal article supplement (doi:10.1039/b818371f), 2009-02-16
Supplement: b818371f.pdf [file b818371f.pdf]

# **A push-pull aromatic chromophore with a touch of merocyanine**

Peter D. Zoon and Albert M. Brouwer\*

University of Amsterdam, van 't Hoff Institute for Molecular Sciences, Nieuwe  
Achtergracht 129, 1018 WS Amsterdam, The Netherlands  
a.m.brouwer@uva.nl

**Supplementary Information**

## Dielectric properties of liquid 2-methyltetrahydrofuran as a function of temperature

The experimental densities of MTHF<sup>1</sup> depend linearly on the temperature according to eq. S1.

$$\rho = 1.12 - 9.2 \times 10^{-4} T \quad (\text{S1})$$

The refractive index can be calculated from its relationship with the density of the solvent, as expressed by the Lorentz-Lorenz equation (eq. S2).<sup>2, 3</sup> It is assumed that the molecular polarizability ( $\alpha$ ) is independent of the temperature.

$$\left( \frac{n^2 - 1}{n^2 + 2} \right) \frac{M}{\rho} = \frac{N_A \alpha}{3\epsilon_0} \quad (\text{S2})$$

In this equation  $n$  is the refractive index of the medium,  $M$  the molecular weight,  $\rho$  the density,  $N_A$  Avogadro's number and  $\epsilon_0$  the vacuum permittivity. The molecular polarizability  $\alpha$  of MTHF was calculated from the literature value of the refractive index  $n = 1.406$  at 293 K.<sup>4</sup>

To describe the temperature dependence of the static dielectric constant of a solvent it is common practice to fit a series of values at different temperatures with a polynomial:

$$\epsilon_r(T) = a + bT + cT^2 + dT^3 \quad (\text{S3})$$

In this way values at temperatures for which measured data are not available can be interpolated or extrapolated. The dielectric constants of MTHF between 180 and 300 K<sup>1, 5</sup> are well fitted with a 2<sup>nd</sup> order polynomial of which the coefficients are:  $a = 25.94$ ,  $b = -0.11$ ,  $c = 1.52 \times 10^{-4}$ .

In Table 1 the refractive indices and the dielectric constants of MTHF are given at the temperatures at which the spectroscopic measurements were performed. Values at temperatures outside the range 180-300 K were extrapolated according to Equation S3, with the coefficients given above.

**Table S1** Calculated dielectric constants and refractive indices of liquid 2-methyltetrahydrofuran (MTHF) at various temperatures.

| Temperature<br>(K) | MTHF <sup>a</sup>   |       |              |
|--------------------|---------------------|-------|--------------|
|                    | $\epsilon$          | $n$   | $\Delta f^b$ |
| 298                | 6.24                | 1.402 | 0.386        |
| 283                | 6.63                | 1.410 | 0.393        |
| 273                | 6.92                | 1.415 | 0.398        |
| 263                | 7.22                | 1.419 | 0.402        |
| 253                | 7.55                | 1.424 | 0.407        |
| 243                | 7.91                | 1.429 | 0.412        |
| 233                | 8.30                | 1.435 | 0.416        |
| 223                | 8.72                | 1.440 | 0.420        |
| 213                | 9.19                | 1.445 | 0.425        |
| 203                | 9.70                | 1.450 | 0.430        |
| 198                | 9.97                | 1.452 | 0.432        |
| 193                | 10.43 <sup>c)</sup> | 1.454 | 0.437        |
| 183                | 10.96 <sup>c)</sup> | 1.459 | 0.440        |
| 173                | 11.51 <sup>c)</sup> | 1.464 | 0.443        |
| 163                | 12.10 <sup>c)</sup> | 1.469 | 0.445        |
| 153                | 12.72 <sup>c)</sup> | 1.475 | 0.447        |
| 143                | 13.36 <sup>c)</sup> | 1.480 | 0.450        |

<sup>a)</sup> Glass transition temperature = 137 K ,

<sup>b)</sup> Defined as  $\Delta f = f(\epsilon) - f(n^2)$  with  $f(\epsilon) = 2(\epsilon-1)/(2\epsilon+1)$  and  $f(n^2) = 2(n^2-1)/(2n^2+1)$

<sup>c)</sup> Values at  $T > 193$  K are extrapolated from eq. S3, others are literature values.<sup>1,5</sup>

With the calculated dielectric constants and refractive indices from Table S1 it is possible to relate the temperature with the polarity of the solvent. In Fig. S1 the values of the polarity functions  $f(\epsilon)$ ,  $f(n^2)$  and  $f(\epsilon)-f(n^2)$  as function of the temperature are shown. The polarity increases with lowering the temperature.

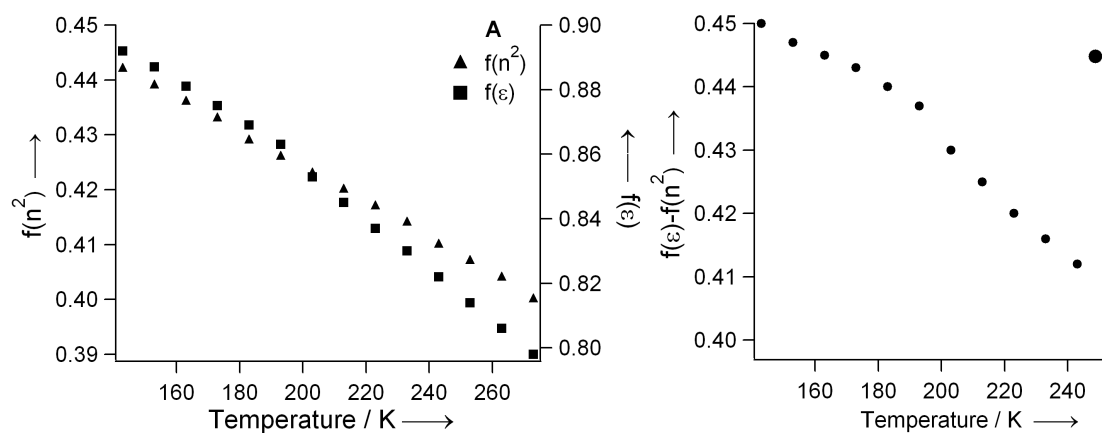

**Fig. S1** The effect of temperature on the solvent polarity functions of liquid MTHF: A,  $f(\epsilon)$  at the right vertical axis and  $f(n^2)$  versus the left vertical axis. B)  $f(\epsilon) - f(n^2)$ , as calculated with the data from Table S1.

## References

1. D. Nicholls, C. Sutphen and M. Szwarc, Dissociation of lithium and sodium salts in ethereal solvents, *J. Phys. Chem. A*, 1968, **72**, 1021-1027.
2. H. A. Lorentz, Über die Beziehung zwischen der Fortpflanzung des Lichtes und der Körperdichte, *Ann. Phys.*, 1880, **3**, 641.
3. L. Lorenz, Über die Refraktionsconstante, *Ann. Phys.*, 1880, **3**, 70.
4. *Handbook of Chemistry and Physics*, CRC, Boca Raton, London, New York, Washington, DC, 2000-2001.
5. C. Wohlfahrt, *Static Dielectric Constants of Pure Liquids and Binary Liquid Mixtures. Landolt-Börnstein - Group IV Physical Chemistry Volume 6*, Springer Verlag, Berlin, Heidelberg, 1991.
